# Supplementary material
Source: PubMed Central journal article supplement (PMC9127461)

A

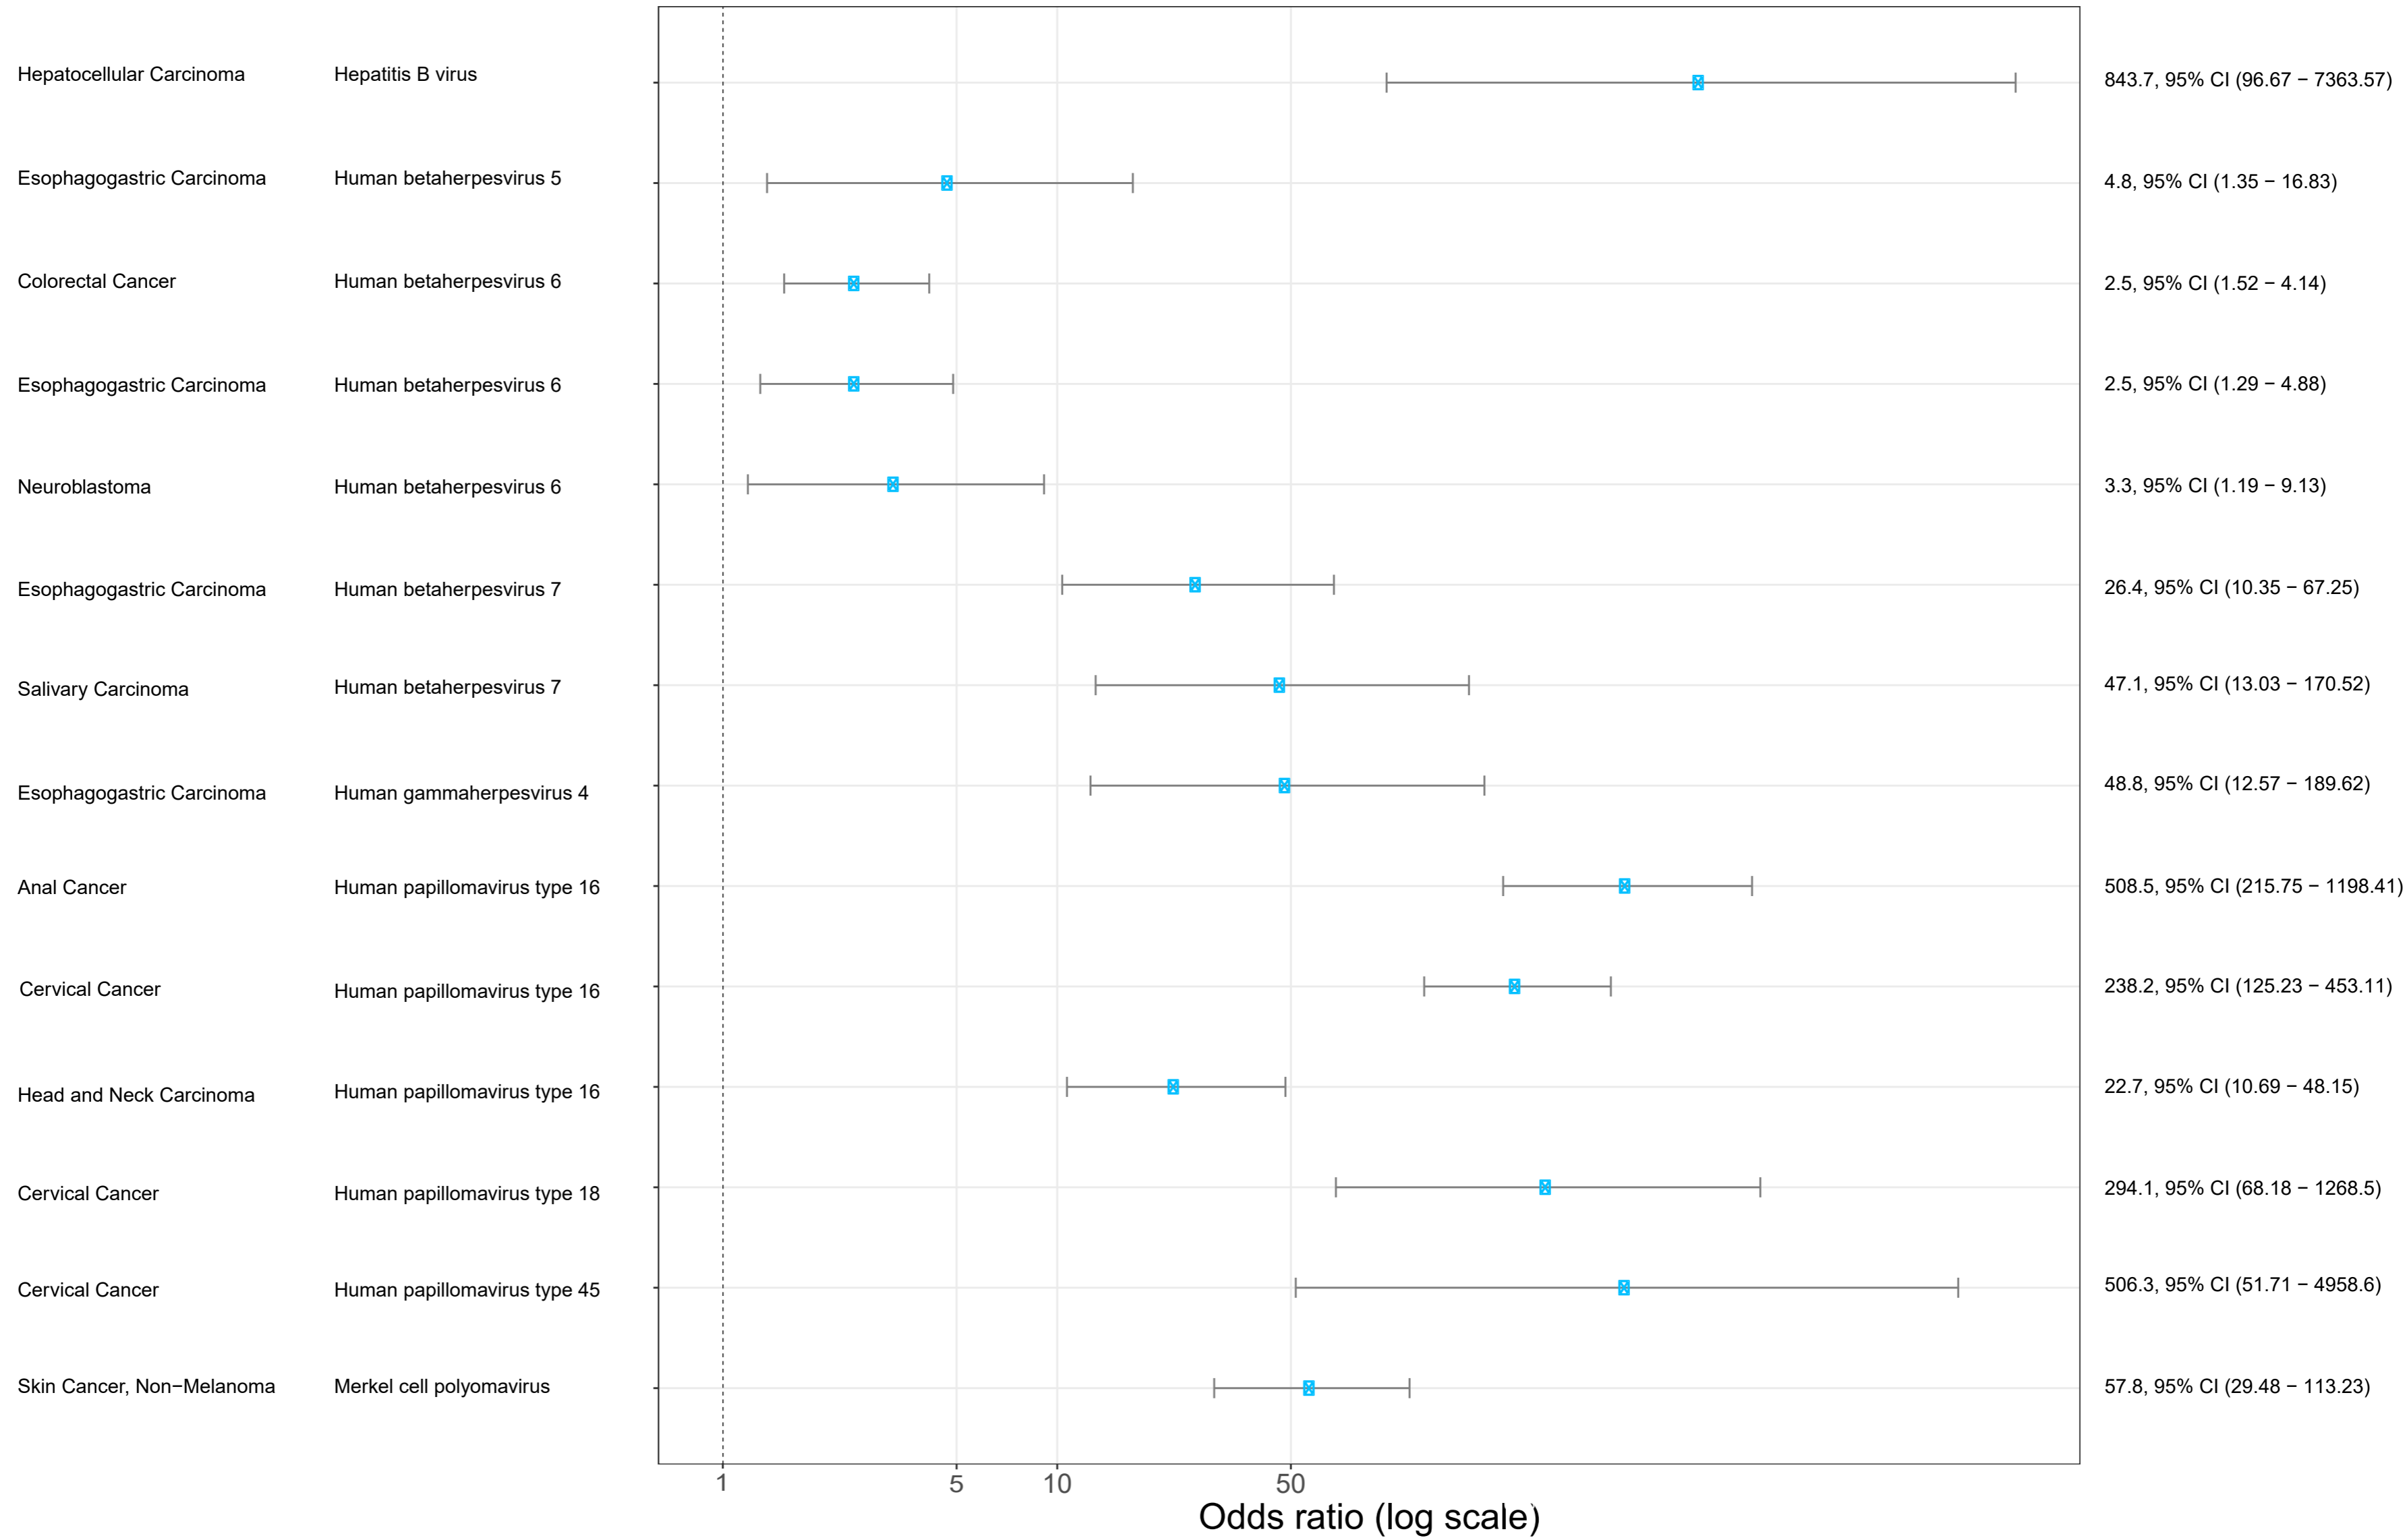

B

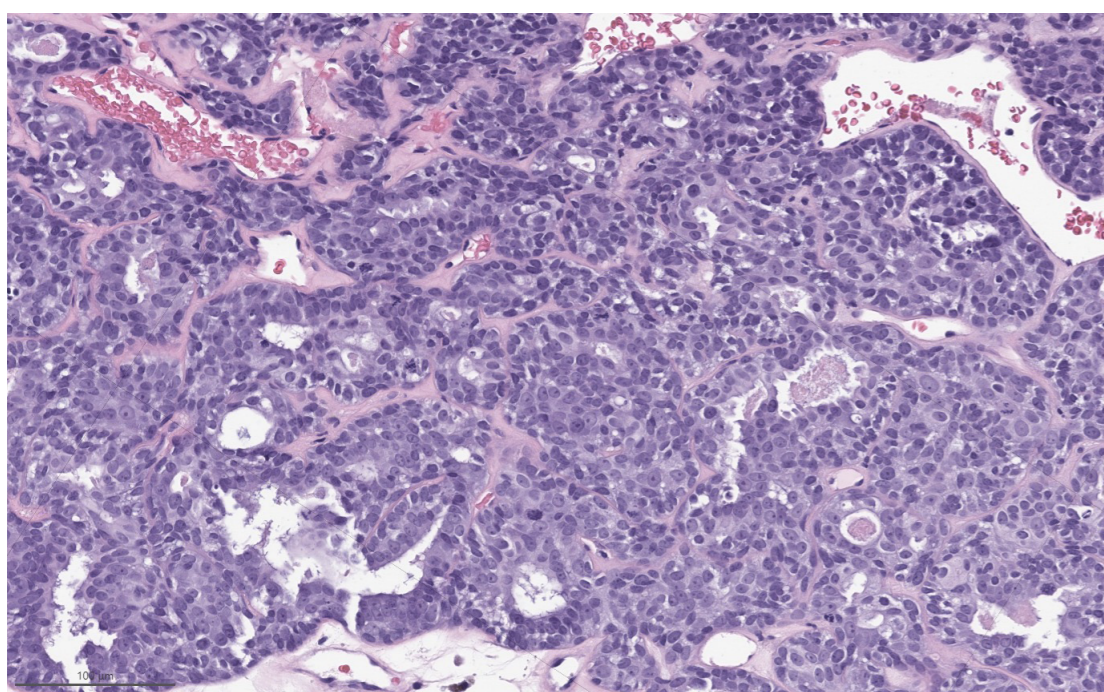

H&amp;E stain 20x

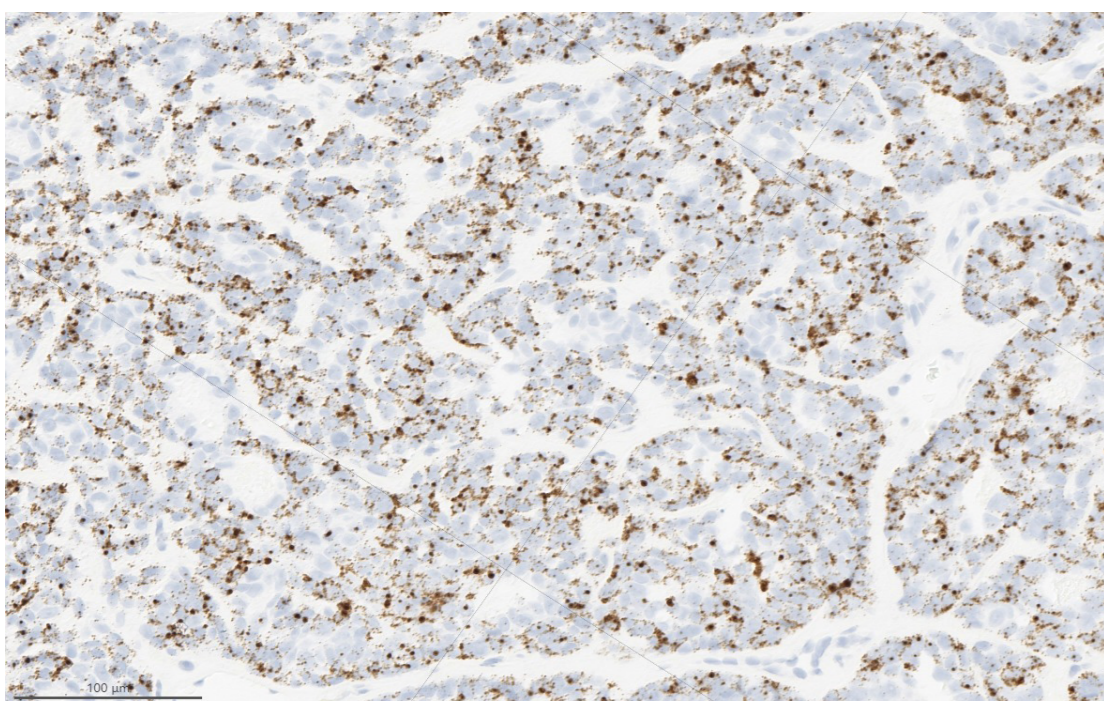

HPV42 RNA ISH 20x

Supplement: mmc1.pdf [file mmc1.pdf]
